# Supplementary material for: Analysis of the correlation between the serum triglyceride glucose index and the risk of death in patients on maintenance hemodialysis: a retrospective cohort study
Source: PeerJ journal article supplement (doi:10.7717/peerj.18781), 2025-01-02
Supplement: codebook.xlsx [file codebook.xlsx]

## Sheet: Sheet1
English-language codebook of data.xlsx file
gender	1 = male, 2 = female
combined with cardiovascular disease	1 = no, 2 = yes
combined with hypertension	1 = no, 2 = yes
combined with diabetes mellitus	1 = no, 2 = yes
outcome of follow-up	1 = MHD, 2 = all-cause death, 3 = receive kidney transplantation, 4 = transfer to other blood purification centers for continued hemodialysis dialysis treatment, 5 = transfer to PD treatment
all-cause death during follow-up	1 = yes, 0 = no
cardiovascular death during the follow-up	1 = yes, 0 = no
classification of all-cause deaths	1 = CVD, 2 = infection, 3 = multiorgan failure, 4 = other cause
classification of cardiovascular death	1 = congestive hear failure, 2 = cerebravascular accidents, 3 = acute myocardial infarction, 4 = sudden cardiac death, 5 = aortic dissection rupture
