# Supplementary material for: Analysis of the correlation between the serum triglyceride glucose index and the risk of death in patients on maintenance hemodialysis: a retrospective cohort study
Source: PeerJ journal article supplement (doi:10.7717/peerj.18781), 2025-01-02
Supplement: data_103882_MKT_EO.xlsx [file data_103882_MKT_EO.xlsx]

## Sheet: 2023.08.01新数据表_1
Number	gender	age(year)	dialysis duration(months)	first dialysis site	combined cardiovascular disease	combined hypertension	combined diabetes mellitus	combinedwith other diseases	WBC	NE	LY	HB	PLT	K	Ca	corrected Ca	BUN	CREA	UA	FPG	ALB	TG	TC	Hcy	KtV	TyG	start time of follow-up	end time of follow-up	duration of follow-up(months)	outcome of follow-up	all-cause death during follow-up	cardiovascular death during follow-up	classification of all-cause deaths	classification of cardiovascular death
1	2	56	95	1	2	2	1	1	3.8	2.9	0.5	60	201	7.9	2.25	2.35	49.23	1348	510.1	3.54	35	3.29	5.8	22.7	1.28	9.13575	2012-07-01	2022-05-24	118	2	1	1	1	1
2	2	49	50	1	2	2	1	1	5.58	4.83	0.42	71	211	5.9	1.83	1.93	45.63	1467	870.9	6.58	35	1.69	5.82	21.2	1.32	9.0895	2012-07-01	2023-06-30	132	1	0	0
3	1	39	40	1	2	1	1	1	12.21	11.25	0.35	64	133	5.3	1.62	1.88	82.24	1748	809.2	10.43	27	1.4	3.64	26.7	1.35	9.36189	2012-07-01	2023-06-30	132	1	0	0
4	2	64	57	1	2	2	2	1	4.09	3.44	0.44	61	153	5.2	1.84	1.9	29.72	1366	330.6	9.76	37	0.75	3.83	31.7	1.21	8.67135	2012-07-01	2021-08-08	109	2	1	1	1	4
5	2	45	53	1	2	2	1	1	10.92	9.15	0.59	79	194	3.4	1.35	1.51	50.53	1466.6	722	6.36	32	0.87	3.59	27.9	1.24	8.3915	2012-07-01	2023-06-30	132	1	0	0
6	1	61	30	1	2	1	2	1	9.52	7.27	0.92	98	232	4.3	1.76	1.78	39.1	1384.7	665.4	6.49	39	0.73	2.75	33.7	1.2	8.23629	2012-07-01	2023-01-05	126	2	1	0	3
7	1	47	28	1	2	1	1	1	4.3	2.19	1.38	99	139	5.1	2.56	2.56	38.75	1524.6	326.6	4.82	40	1.32	3.48	28.7	1.3	8.53114	2012-07-01	2023-06-30	132	1	0	0
8	1	51	28	1	2	1	2	1	10.29	7.44	1.05	80	154	4.6	1.92	1.98	26.57	827.3	514.5	3.25	37	0.69	2.52	27	1.23	7.48833	2012-07-01	2023-01-28	126	2	1	0	2
9	2	49	115	1	1	2	1	1	4.53	3.35	0.88	64	220	4.6	2.34	2.3	26.57	1449	420.3	4.73	42	0.81	5.85	32.1	1.33	8.02394	2012-07-01	2023-06-30	132	1	0	0
10	2	66	90	1	2	2	1	1	4.66	3.54	0.45	85	135	3.1	2.09	2.13	15.77	885	792.4	5.87	38	4.05	6.96	30.2	1.27	9.84931	2012-07-01	2022-05-02	118	2	1	0	3
11	1	47	104	1	1	2	1	2	7.88	7.09	0.58	53	178	5	1.83	1.95	69	1807	768.5	6.48	34	1.53	3.13	30.5	1.28	8.97472	2012-07-01	2022-03-03	116	4	0	0
12	2	74	28	1	2	1	1	1	7.87	6.95	0.4	78	122	4.6	2.52	2.72	61.52	1030.4	653.6	7.37	30	1.23	2.84	28.73	1.24	8.88517	2012-07-01	2023-05-09	130	2	1	0	2
13	2	52	33	1	2	2	1	1	6.57	4.95	0.81	56	169	5.9	1.54	1.52	40.56	1550.4	544	5.04	41	1.16	4.12	27.1	1.21	8.44656	2012-07-01	2023-06-30	132	1	0	0
14	1	71	49	1	1	2	1	1	2.8	2.01	0.52	55	65	4.7	2.17	2.25	39.4	1118.7	361.1	6.11	36	0.76	4.49	31.7	1.24	8.21623	2012-07-01	2023-06-30	132	1	0	0
15	1	59	35	1	2	2	2	1	7.48	6.21	0.3	56	190	3.9	1.91	2.01	34.88	1001	656.9	9.47	35	1.14	4.53	29.8	1.33	9.05989	2012-07-01	2022-05-10	118	2	1	1	1	1
16	1	55	64	1	2	2	1	1	4.23	3.13	0.44	88	90	4.1	1.9	1.96	39.7	1156	724.6	6.42	37	2.72	6.26	38.4	1.36	9.54079	2012-07-01	2023-06-30	132	1	0	0
17	1	67	51	1	2	2	1	1	5.7	4.51	0.57	84	122	5.8	1.98	1.98	37.03	1027.6	513.8	5.49	40	0.98	4.14	18.8	1.3	8.36346	2012-07-01	2023-06-30	132	1	0	0
18	2	44	39	1	2	2	1	1	4.51	3.23	0.91	65	80	5.3	2.09	2.03	40.75	1782	725.7	4.82	43	1.54	5.12	43	1.37	8.68529	2012-07-01	2023-06-30	132	1	0	0
19	1	59	53	1	2	2	2	2	7.15	6.02	0.46	44	143	5.9	1.75	2.09	48.45	791.8	457.5	4.2	23	1.64	3.41	36.2	1.24	8.61052	2012-07-01	2023-06-30	132	1	0	0
20	2	58	13	1	2	2	2	1	5.49	3.84	1.22	63	139	3.2	2.09	2.45	23.16	585	637.4	4.9	22	1.67	5.52	28.7	1.21	8.78279	2012-07-01	2022-03-07	116	2	1	1	1	2
21	1	29	75	1	2	2	1	1	10.1	8.91	0.67	55	152	5.4	1.61	1.75	49.4	1622	708.2	7.46	33	1.17	4.82	24.4	1.39	8.84729	2012-07-01	2023-06-30	132	1	0	0
22	2	53	61	1	2	2	2	2	4.26	3.07	0.41	62	273	6.1	2.03	2.39	16.7	543	364.4	4.9	22	0.85	4.8	22.4	1.3	8.10745	2012-07-01	2021-06-28	107	4	0	0
23	1	62	50	1	2	2	2	1	4.97	3.64	0.83	82	160	4.6	2.01	2.11	48.24	1487	756.8	7.21	35	3.04	4.69	59.9	1.2	9.76806	2012-07-01	2023-01-11	126	2	1	0	3
24	1	62	28	1	2	2	1	1	16.49	12.44	2.01	70	326	6.4	1.87	2.05	27.3	655.7	595.8	4.6	31	0.94	3.08	28.66	1.18	8.14492	2012-07-01	2023-06-30	132	1	0	0
25	2	66	25	1	2	2	1	1	4.62	4.03	0.39	86	85	4.5	1.48	1.52	43.55	1090	633.3	5.54	38	1.73	5.4	23.4	1.21	8.94085	2012-07-01	2022-12-30	125	2	1	1	1	2
26	1	61	36	1	2	2	1	1	5.86	5.02	0.44	93	108	4.5	2.16	2.16	66.25	1293.9	673.6	6.18	40	1.17	3.48	31.8	1.23	8.65906	2012-07-01	2023-06-30	132	1	0	0
27	1	27	94	1	1	1	1	2	18.88	17.48	0.18	65	199	3.4	1.44	1.58	37.93	1353.2	689.6	6.76	33	1.22	2.53	37.1	1.37	8.79061	2012-07-01	2023-06-30	132	1	0	0
28	1	61	42	1	2	2	1	1	5.2	3.81	0.56	90	145	4.3	2.39	2.39	36.67	1026.2	539.7	11.42	40	1.14	3.33	41.8	1.38	9.24713	2012-07-01	2023-06-30	132	1	0	0
29	1	46	38	1	1	2	2	1	6.23	4.25	1.03	78	332	6	2.04	2.3	19.79	566.8	454.6	6.94	27	3.16	6.18	22.4	1.29	9.76861	2012-07-01	2023-06-30	132	1	0	0
30	2	47	29	1	2	1	1	2	7.77	6.33	0.54	50	171	5.8	1.91	2.23	42.62	1161.4	603	6.24	24	1.79	6.99	28.64	1.21	9.09393	2012-07-01	2023-06-30	132	1	0	0
31	2	44	78	1	2	2	1	1	17.01	15.48	1.23	87	243	3.5	1.96	2.16	52.64	1235	635.9	6.3	30	2.35	4.56	24.2	1.27	9.3757	2012-07-01	2023-06-30	132	1	0	0
32	1	43	55	1	1	2	1	1	9.15	6.54	1.61	76	314	5.3	2.09	2.17	38.18	1623.8	687.5	5.35	36	2.41	6.18	33	1.28	9.23746	2012-07-01	2023-06-30	132	1	0	0
33	2	42	70	1	2	2	1	1	3.85	3.02	0.36	83	157	5.3	1.7	1.8	27.7	1190	818.2	4.58	35	1	4.35	17.8	1.21	8.20243	2012-07-01	2023-06-30	132	1	0	0
34	1	60	33	1	2	1	2	1	4.41	3.37	0.66	70	126	3.6	2.33	2.45	19.41	771.5	439.5	9.86	34	0.98	3.77	26	1.3	8.94902	2012-07-01	2023-06-16	131	2	1	1	1	1
35	2	23	119	1	1	1	1	2	4.42	4.36	0.03	41	30	8.22	2.23	2.454	74.55	2718.4	582.2	3.5	28.8	0.74	3.06	10.7	1.2	7.63239	2012-07-01	2023-06-30	132	1	0	0
36	1	53	77	1	2	2	1	1	7.06	5.66	0.57	69	263	5	1.97	2.17	53.09	629	613.8	7.38	30	0.98	3.94	25.8	1.21	8.65931	2012-07-01	2023-06-30	132	1	0	0
37	2	55	108	1	2	2	1	1	6.53	4.7	0.73	73	163	4.6	2.22	2.22	33.16	1040	357.9	4.79	40	1.52	4.8	26.2	1.28	8.66598	2012-07-01	2023-06-30	132	1	0	0
38	2	68	88	1	2	2	1	1	7.14	6.29	0.37	71	335	7.3	1.47	1.73	52.16	1278	907.6	5.83	27	1.5	4.6	24.9	1.28	8.84922	2012-07-01	2023-06-30	132	1	0	0
39	1	54	73	1	2	2	2	1	14.19	12.71	0.35	65	225	2.6	2	2.18	34.5	1477	601.5	4.18	31	0.94	2.92	32.7	1.21	8.04917	2012-07-01	2023-01-22	126	2	1	0	2
40	1	67	61	1	2	1	2	1	6.97	6.1	0.51	86	180	6.4	1.74	2.04	29.14	1139.7	465.8	6.56	25	0.86	3.8	20.8	1.26	8.4109	2012-07-01	2023-06-30	132	1	0	0
41	2	58	62	1	2	2	1	1	8.04	6.73	0.86	71	158	3.9	1.9	1.98	37.08	775.2	645.4	7.71	36	1.64	3.65	26.6	1.31	9.21795	2012-07-01	2023-06-30	132	1	0	0
42	2	80	82	1	2	1	1	1	5.96	4.99	0.65	39	128	7.9	1.14	1.38	55.2	1320	721.7	5.71	28	0.62	2.24	37.2	1.33	7.94492	2012-07-01	2023-06-30	132	1	0	0
43	2	57	30	1	2	2	1	1	6.97	5.53	0.64	63	369	5	1.91	2.25	29.67	1304.8	576.8	4.51	23	1.23	3.89	28.93	1.3	8.39405	2012-07-01	2023-06-30	132	1	0	0
44	1	69	34	1	2	2	2	1	4.03	3.25	0.38	79	144	5.7	1.88	2.12	23.76	748.8	451.8	7.37	28	0.83	3.49	25.2	1.2	8.49182	2012-07-01	2022-02-09	115	2	1	1	1	1
45	1	77	31	1	2	2	1	1	7.37	5.71	1.1	81	228	5.5	1.74	1.74	34.82	996.2	607.1	8.69	40	1.33	3.2	70.4	1.21	9.12809	2012-07-01	2022-01-07	114	2	1	0	2
46	1	68	91	1	2	2	1	1	4.92	3.94	0.62	130	169	3.9	1.94	2.12	41.11	1250	668.4	6.4	31	0.94	3.49	41.2	1.2	8.47516	2012-07-01	2022-06-08	119	2	1	1	1	1
47	1	45	53	1	1	2	1	1	2.81	2.12	0.48	43	92	4.6	1.79	1.97	96	2622	380.9	6.92	31	1.23	3.18	25.8	1.31	8.82217	2012-07-01	2023-06-30	132	1	0	0
48	1	47	87	1	1	2	1	2	4.91	3.47	0.95	77	139	6.4	2.18	2.22	27.87	1362	294.8	5.48	38	0.69	2.67	20.8	1.27	8.01078	2012-07-01	2023-06-30	132	1	0	0
49	1	53	37	1	2	2	2	1	5.41	3.57	0.99	78	191	4.3	2.06	2.3	14.64	772	221.8	10.79	28	1.02	3.09	29.2	1.37	9.07916	2012-07-01	2023-06-30	132	1	0	0
50	2	63	66	1	2	2	2	2	9.45	7.67	0.48	76	159	4.9	2.39	2.55	15.19	391.9	279.3	7.56	32	1.37	3.16	22.4	1.23	9.01842	2012-07-01	2023-06-30	132	1	0	0
51	2	68	56	1	2	2	2	1	11.74	8.93	1.47	58	270	4.8	2.02	2.26	34.2	909.3	715	3.8	28	1.54	4.99	17.2	1.29	8.44752	2012-07-01	2023-06-30	132	1	0	0
52	1	65	42	1	2	2	2	2	5.3	4.37	0.29	75	264	5.1	2.26	2.46	28.96	699.1	550.8	7.03	30	0.92	3.7	45.2	1.3	8.54754	2012-07-01	2023-06-30	132	1	0	0
53	2	53	48	1	1	2	1	1	4.39	3.3	0.42	76	206	5	1.97	2.05	43.91	1339	884.3	5.08	36	1.92	4.67	29.4	1.33	8.95837	2012-07-01	2023-06-30	132	1	0	0
54	2	64	27	1	1	2	1	1	8.65	5.99	1.09	65	159	4.1	1.84	1.96	28.46	903.8	581.4	5.51	34	1.72	7.14	28.57	1.28	8.92962	2012-07-01	2023-06-30	132	1	0	0
55	1	52	78	1	2	2	2	1	7.61	6.21	0.64	62	215	4.4	2.06	2.12	30.03	379	762	7.04	37	0.76	3.29	22.7	1.29	8.35791	2012-07-01	2023-06-30	132	1	0	0
56	2	38	89	1	2	2	1	1	6.59	5.94	0.47	23	179	5.8	1.87	2.01	32.5	2313	979.8	7.99	33	1.04	3.85	31.9	1.33	8.79815	2012-07-01	2023-06-30	132	1	0	0
57	2	77	11	1	2	2	2	1	10.57	8.76	0.89	66	249	3.3	1.87	2.07	22.35	884	509.7	7.99	30	1.64	7.11	28.93	1.21	9.25362	2012-07-01	2022-10-20	123	2	1	1	1	1
58	2	67	26	1	2	2	2	1	7.36	6.3	0.28	71	218	3.9	1.87	1.93	27.07	1083.5	699.6	11.13	37	1.18	4.95	23.1	1.23	9.25589	2012-07-01	2022-12-31	125	2	1	1	1	1
59	1	57	38	1	2	2	2	1	6.9	5.51	0.64	117	218	5.1	2.15	2.27	41.46	1091.6	524.7	12.2	34	1.72	4.76	25	1.26	9.7245	2012-07-01	2023-06-30	132	1	0	0
60	1	43	50	1	1	2	1	1	9.21	8.03	0.57	92	222	5.7	2.13	2.03	28.39	930.9	595	5.09	45	0.94	4.53	37.8	1.27	8.24614	2012-07-01	2023-06-30	132	1	0	0
61	2	71	80	1	2	1	2	1	7.89	6.22	0.73	79	261	6.7	2.22	2.26	35.53	722	396.9	8.93	38	0.82	2.64	17.2	1.28	8.6717	2012-07-01	2023-06-30	132	1	0	0
62	2	51	72	1	2	1	1	1	4.98	3.06	1.1	88	143	5.7	2.15	2.17	42.52	1292	724.7	4.61	39	0.81	5.71	26.1	1.32	7.99824	2012-07-01	2023-06-30	132	1	0	0
63	1	58	78	1	2	2	2	1	11.23	10.15	0.44	101	167	6.2	1.9	1.98	30.57	933	329.5	4.92	36	0.85	4.04	20.6	1.3	8.11153	2012-07-01	2023-06-30	132	1	0	0
64	1	57	30	1	2	2	2	1	5.69	4.6	0.36	102	123	4.2	1.99	2.23	28.33	666.9	312.6	7.86	28	2.16	5.04	27.75	1.36	9.51263	2012-07-01	2023-06-30	132	1	0	0
65	2	57	75	1	2	2	2	1	6.62	6	0.32	95	207	6.7	2.47	2.61	31.19	791	472.9	7.36	33	1.23	5.65	26.4	1.3	8.88381	2012-07-01	2023-06-30	132	1	0	0
66	2	51	19	1	2	2	2	1	5.48	4.48	0.56	66	182	4.7	2.16	2.22	45.21	1128.1	602.4	3.42	37	0.87	4.31	53.9	1.29	7.77111	2012-07-01	2021-12-20 15:59:21	113	4	0	0
67	2	64	31	1	1	2	1	1	6.22	4.42	1.28	111	164	4.9	2.25	2.15	43.03	1527.5	404.7	4.97	45	2.12	5.22	22	1.27	9.03557	2012-07-01	2023-06-30	132	1	0	0
68	1	39	55	1	2	2	1	1	6.92	5.54	0.74	72	95	5.8	2.01	2.03	56.95	1365.5	682.4	4.91	39	0.88	3.97	51.3	1.3	8.14418	2012-07-01	2023-06-30	132	1	0	0
69	1	63	67	1	2	2	1	1	8.87	5.2	1.05	67	193	4.7	2.26	2.26	56.79	1443	828.9	9.29	40	1.24	5.96	54.3	1.24	9.12479	2012-07-01	2022-08-23	121	2	1	0	2
70	2	44	89	1	1	2	1	1	7.29	5.96	0.62	72	170	4.1	1.95	1.85	26.78	907.5	671.5	6.38	45	1.64	6.22	33.1	1.36	9.0286	2012-07-01	2023-06-30	132	1	0	0
71	2	43	77	1	2	2	1	2	19.83	18.86	0.42	48	284	6.2	1.86	2.1	61.92	1993	718.6	5.89	28	1.03	2.96	19.6	1.23	8.48355	2012-07-01	2023-06-30	132	1	0	0
72	2	52	71	1	2	2	2	1	6.11	5.01	0.58	54	198	2.9	2.07	2.23	47.05	1381	571.6	10.45	32	2.1	7.06	32.9	1.2	9.76927	2012-07-01	2023-06-30	132	1	0	0
73	2	67	51	1	2	2	2	1	11.97	9.96	0.76	96	224	3.5	2	2.12	20.05	638	277.7	6.28	34	1.38	5.01	23	1.18	8.84019	2012-07-01	2022-07-29	120	2	1	1	1	4
74	1	61	64	1	2	2	1	1	3.21	2.81	0.22	17	129	5	1.39	1.55	69.99	2437.2	845	6.12	32	2.29	4.18	44.3	1.3	9.32085	2012-07-01	2023-06-30	132	1	0	0
75	2	69	29	1	2	2	1	1	6.56	5.58	0.54	62	145	4.4	1.87	1.97	41.09	1161.3	509.6	6.69	35	1.59	5.53	29.75	1.34	9.04508	2012-07-01	2023-06-30	132	1	0	0
76	2	56	53	1	2	2	1	1	6.27	5.18	0.73	59	170	4.3	1.2	1.08	43.14	1127.2	561.8	6.8	46	1.74	3.13	31.1	1.35	9.15154	2012-07-01	2023-06-30	132	1	0	0
77	2	69	29	1	2	2	1	1	7.6	5.55	1.48	67	172	4.1	2.25	2.11	40.56	933	262.7	12.77	47	1.17	4.61	28.71	1.32	9.38484	2012-07-01	2023-06-30	132	1	0	0
78	2	41	137	1	1	2	1	1	2.8	2.4	0.3	60	84	5.91	1.46	1.72	72.1	1473.9	279	3.14	27	1.61	2.71	45	1.24	8.30119	2012-07-01	2023-06-30	132	1	0	0
79	1	67	29	1	1	2	2	1	6.92	6.13	0.32	63	154	6.5	1.77	1.99	68.96	1982.4	551.2	11.62	29	1.1	3.86	28.79	1.37	9.22877	2012-07-01	2023-06-30	132	1	0	0
80	2	50	61	1	2	2	2	2	6.61	5.08	0.83	91	163	3.8	1.5	1.78	11.97	634	363.8	3.11	26	1.95	5.04	9.7	1.25	8.48319	2012-07-01	2022-08-07	121	2	1	1	1	2
81	2	56	63	1	2	2	1	1	13.41	11.18	1.23	91	111	4.4	1.84	2	31.3	976.1	836.1	7.38	32	1.27	4.44	29.1	1.34	8.91853	2012-07-01	2023-06-30	132	1	0	0
82	1	37	48	1	1	2	2	1	4.06	3.03	0.55	80	121	5	1.64	1.98	28.14	1357.2	490.8	11.11	23	1.48	3.5	17.1	1.36	9.48062	2012-07-01	2023-06-30	132	1	0	0
83	1	62	77	1	2	2	1	1	12.33	11.56	0.26	80	176	5.8	2.09	2.17	41.75	685	585.3	10.83	36	0.65	4.57	35.7	1.27	8.63227	2012-07-01	2022-09-07	122	2	1	1	1	4
84	2	68	33	1	2	1	1	1	8.02	6.99	0.36	83	203	3.6	1.59	1.81	32.62	821	468.6	8.6	29	1.75	2.89	75	1.3	9.39211	2012-07-01	2023-06-30	132	1	0	0
85	1	54	43	1	1	2	2	1	4.53	3.82	0.36	67	186	4.6	2.14	2.28	23.78	710	491.6	12.17	33	2.12	4.96	20.9	1.33	9.93113	2012-07-01	2023-06-30	132	1	0	0
86	1	62	44	1	2	2	2	1	9.13	6.61	1.57	117	227	4.3	2.23	2.17	31.16	1156.8	440.7	4.65	43	1.62	3.69	43.1	1.27	8.70003	2012-07-01	2023-06-30	132	1	0	0
87	2	47	138	1	1	2	1	1	11.5	10.38	0.54	87	117	5.2	1.49	1.45	59.9	1169	633.8	5.33	42	4.04	6.35	16.6	1.3	9.75033	2012-07-01	2023-06-30	132	1	0	0
88	2	82	29	1	2	1	2	2	10.12	7.31	1.42	80	308	4.5	2.21	2.25	25.22	610.2	632.2	6.5	38	1.21	6.26	26.9	1.21	8.74316	2012-07-01	2023-06-30	132	1	0	0
89	2	64	58	1	2	2	2	1	9.46	8.6	0.22	69	140	4.5	2.02	2.08	24.58	675.2	680.7	11.61	37	0.68	4.65	19.9	1.24	8.74694	2012-07-01	2023-01-04	126	2	1	0	2
90	2	51	75	1	2	2	1	2	6.27	5.44	0.36	52	228	4.6	1.6	1.68	17.47	1013	440.1	4.98	36	0.65	3.62	16.5	1.22	7.85538	2012-07-01	2022-11-07	124	2	1	1	1	1
91	2	64	90	1	2	2	2	1	7.61	6.15	0.62	42	106	3.6	1.66	1.7	38.78	1154	500.1	8.89	38	1.26	3.42	30.4	1.19	9.09677	2012-07-01	2023-06-30	132	1	0	0
92	1	49	87	1	2	2	1	1	6.94	4.98	0.85	60	228	5.6	2.08	2.22	56	1364	454.5	7.08	33	2.03	4.65	33.2	1.28	9.34605	2012-07-01	2023-06-30	132	1	0	0
93	2	62	45	1	2	2	1	1	5.18	4	0.61	68	109	6.4	2.06	2.04	36.41	1779.5	482.7	5.69	41	1.09	4.32	35.9	1.23	8.50562	2012-07-01	2023-06-30	132	1	0	0
94	1	64	45	1	1	2	2	1	5.54	4.62	0.45	73	306	3.5	2.43	2.59	21.79	846.8	168.4	9.32	32	2.65	5.58	42	1.3	9.88746	2012-07-01	2023-06-30	132	1	0	0
95	1	60	43	1	2	2	2	1	8.42	6.33	1.2	83	343	5.1	1.92	2.12	27.3	764.9	386.1	5.91	30	1.13	5.46	22.2	1.36	8.5796	2012-07-01	2023-06-30	132	1	0	0
96	1	81	57	1	2	2	1	1	6.05	5.12	0.42	70	173	4.6	2	2.12	41.73	1104	762.7	6.04	34	1.08	5.54	33.4	1.24	8.5561	2012-07-01	2022-12-31	125	2	1	1	1	4
97	1	54	49	1	2	2	2	1	5.36	3.6	0.79	88	218	6.9	1.84	1.84	36.1	947.6	442.6	13.25	40	1.59	5.23	16.8	1.33	9.72847	2012-07-01	2022-03-16	116	2	1	1	1	2
98	1	51	35	1	2	1	1	1	6.36	4.36	1.15	73	254	4	2.16	2.2	31.25	1431	599.4	6.09	38	2.05	4.36	32.7	1.24	9.20522	2012-07-01	2023-06-30	132	1	0	0
99	1	64	82	1	2	2	2	2	5.56	4.6	0.55	61	115	6	1.9	2	34.2	950.7	474.1	5.92	35	1.96	5.22	33.4	1.23	9.13202	2012-07-01	2023-01-19	126	2	1	0	2
100	1	49	65	1	2	2	2	1	8.52	7.32	0.53	85	129	6	1.77	1.93	89.8	1165.6	684.3	13.43	32	2.7	5.16	34.5	1.33	10.2715	2012-07-01	2023-06-30	132	1	0	0
101	1	38	55	1	1	2	1	2	8.23	6.74	0.75	63	239	4.7	1.64	1.88	44.84	2291.8	496.2	5.64	28	1.96	4.69	29.8	1.32	9.08356	2012-07-01	2023-06-30	132	1	0	0
102	1	65	32	1	2	1	2	1	10.06	8.51	0.68	91	172	4.4	2.11	2.19	37.18	1109.6	381.7	8.37	36	2.6	6.15	28.01	1.22	9.7609	2012-07-01	2023-06-30	132	1	0	0
103	1	35	16	1	2	1	2	1	7.62	4.77	1.5	111	235	4.2	2.22	2.36	22.01	1280.9	397.1	3.84	33	2.89	3.11	24.7	1.24	9.08746	2012-07-01	2021-11-28	112	4	0	0
104	1	75	24	1	2	2	2	1	12.03	10.53	0.52	73	287	4.1	2.03	2.17	30.51	745.3	698.2	8.64	33	1.65	5.63	30.6	1.23	9.33791	2012-07-01	2023-02-10	127	2	1	0	2
105	2	65	42	1	2	2	2	1	14.59	12.01	1.35	63	270	4.7	1.97	2.19	27.87	922.1	703.7	7.84	29	2.26	3.81	21.7	1.27	9.55534	2012-07-01	2023-06-30	132	1	0	0
106	1	78	25	1	2	2	1	1	5.8	2.52	0.46	58	150	4.7	1.83	1.95	32.56	1077.2	521.5	4.68	34	0.71	2.42	27.3	1.25	7.88154	2012-07-01	2023-02-25	127	2	1	0	4
107	2	81	35	1	2	1	2	1	10.2	8.49	0.68	76	263	4.4	2.1	2.12	38.14	853.7	733.2	5.44	39	1.82	4.21	30.2	1.28	8.97335	2012-07-01	2021-09-04	110	2	1	1	1	2
108	2	70	37	1	2	2	2	1	9.68	7.15	1.73	56	379	4.1	1.75	1.95	21.01	566.4	276.3	7.14	30	2.18	4.67	13	1.22	9.42577	2012-07-01	2021-09-24	110	2	1	1	1	4
109	2	66	45	1	2	2	1	1	7.01	5.55	0.57	89	221	4.6	1.28	1.18	43.66	1146.2	450.1	6.16	45	0.76	4.47	36.4	1.25	8.22438	2012-07-01	2023-06-30	132	1	0	0
110	2	72	68	1	2	2	1	1	8.73	7.62	0.47	36	156	4.1	1.56	1.84	49.42	1249	632.7	7.9	26	1.16	4.1	25.7	1.23	8.89602	2012-07-01	2023-06-30	132	1	0	0
111	2	51	105	1	1	2	1	1	5.34	3.93	1	59	224	4.9	2.35	2.15	43.57	1443.2	651.1	5.36	50	1.4	4.83	36.2	1.27	8.69617	2012-07-01	2023-06-30	132	1	0	0
112	2	59	72	1	2	2	1	1	5.61	4.31	0.66	57	120	4	1.97	2.13	31.25	1285	392	4.67	32	1.84	5.38	27.4	1.33	8.83166	2012-07-01	2023-06-30	132	1	0	0
113	1	64	43	1	2	2	1	2	6.25	5.27	0.4	90	297	4.7	2.02	2.16	24.29	1162.7	579.6	6.64	33	1.05	4.34	18.5	1.27	8.62264	2012-07-01	2023-06-30	132	1	0	0
114	1	65	19	1	2	2	1	2	5.85	4.71	0.45	71	171	4.8	1.85	1.95	53.27	1444.1	650.9	4.93	35	2.21	6.66	32.6	1.26	9.06907	2012-07-01	2022-10-22	123	2	1	1	1	1
115	1	66	39	1	2	2	2	1	9.39	7.05	1.21	84	196	5.7	1.84	2.04	21.56	848.1	459.3	3.41	30	1.1	4.93	13.5	1.23	8.00276	2012-07-01	2022-06-30	119	2	1	1	1	4
116	2	71	59	1	1	2	2	1	8.75	7.46	0.75	82	206	4.3	1.18	1.24	33.58	1506.3	513.7	6.89	37	2.33	4.32	35.1	1.32	9.45667	2012-07-01	2023-06-30	132	1	0	0
117	2	53	64	1	2	2	2	2	19.42	17.14	1.04	56	313	5.6	2.28	2.62	42.86	601.7	427	12.04	23	1.27	3.17	4.6	1.33	9.40799	2012-07-01	2023-06-30	132	1	0	0
118	2	24	53	1	2	1	1	1	5.69	5.04	0.31	52	102	6.1	1.07	1.27	53.06	1134.4	500.3	10.13	30	1.97	3.88	16.9	1.38	9.67427	2012-07-01	2023-06-30	132	1	0	0
119	1	32	56	1	2	2	1	2	7.43	4.53	1.77	73	156	4	1.64	1.8	41.5	1650.9	591.1	5.17	32	0.69	3.62	17.9	1.26	7.95254	2012-07-01	2023-06-30	132	1	0	0
120	1	64	45	1	2	2	2	2	4.65	3.25	0.67	81	139	3.4	1.73	1.77	34.02	1015.3	536.8	5	38	1.18	3.22	42.8	1.27	8.45569	2012-07-01	2023-06-30	132	1	0	0
121	1	72	33	1	2	2	2	2	3.76	3.26	0.21	62	124	5.8	2.27	2.37	36.5	1211.7	466.3	2.98	35	1.95	6.95	48.4	1.25	8.44049	2012-07-01	2023-01-03	126	2	1	1	1	1
122	1	71	33	1	2	2	1	1	9	7.25	0.81	88	114	3.8	1.85	2.03	26.9	751.5	283.8	4.63	31	0.9	3.46	21.5	1.21	8.10793	2012-07-01	2021-12-06	113	2	1	0	3
123	2	65	69	1	2	2	1	1	13.74	11.57	1.26	91	211	3.2	2.08	2.3	26.43	370	693.3	8.38	29	0.8	7.08	22.4	1.25	8.58344	2012-07-01	2023-06-30	132	1	0	0
124	1	58	34	1	2	2	1	2	8.73	6	1.79	66	301	4.6	1.31	1.47	57.68	1661	627	9.03	32	1.63	3.11	33.2	1.3	9.36987	2012-07-01	2023-06-30	132	1	0	0
125	1	30	71	1	2	2	2	2	5.49	4.09	0.91	75	196	5.9	1.9	2.06	40.33	1268	569.8	9.11	32	1.13	4.46	26.7	1.33	9.01233	2012-07-01	2023-06-30	132	1	0	0
126	2	56	46	1	1	2	1	1	6.89	5.73	0.4	59	90	4.2	1.83	2.01	43.36	1446.3	638	5.53	31	1.13	4.04	42.1	1.34	8.51314	2012-07-01	2023-06-30	132	1	0	0
127	2	49	84	1	2	2	1	1	6.88	5.86	0.59	100	116	5.4	2.01	2.27	45.54	2224	925.3	5.73	27	1.45	5.96	25.9	1.3	8.79801	2012-07-01	2022-01-19	114	2	1	1	1	2
128	2	76	79	1	2	2	1	1	12.38	11.04	0.69	79	240	4.9	1.13	1.33	51.51	1652	548.8	6.05	30	1.55	4.07	30.9	1.27	8.91905	2012-07-01	2022-06-23	119	2	1	1	1	1
129	1	42	25	1	1	2	1	1	7.02	4.81	1.32	82	126	5	1.5	1.56	34.33	1237.6	270.9	5.26	37	2.24	5.7	20.6	1.32	9.14734	2012-07-01	2023-06-30	132	1	0	0
130	2	57	101	1	2	2	1	1	4.96	3.8	0.28	84	148	3	1.98	2.08	17.71	740	395.5	6.13	35	3.17	4.09	7.9	1.29	9.64766	2012-07-01	2023-06-30	132	1	0	0
131	2	53	16	1	2	2	1	1	5.07	3.83	0.74	54	111	6.54	2.06	0.12	41.92	1580.3	723.6	4.98	37	1.94	4.61	30.7	1.24	8.94885	2012-07-01	2021-11-04	112	2	1	1	1	2
132	2	49	48	1	1	2	1	1	9.2	8.4	0.28	53	139	4.8	1.31	1.35	68.3	1650	559	7.29	38	1.18	3.1	50.1	1.37	8.83275	2012-07-01	2023-06-30	132	1	0	0
133	1	48	75	1	1	2	1	1	16.86	14.83	0.98	109	181	6.2	1.77	1.79	54.44	1883	865.7	6.18	39	1.37	4.26	32.4	1.34	8.81686	2012-07-01	2023-06-30	132	1	0	0
134	2	59	88	1	2	2	1	2	8.72	7.22	0.69	86	123	4.2	1.92	2.02	21.65	762.4	595.7	4.78	35	1.76	5.16	29.3	1.35	8.81049	2012-07-01	2023-06-30	132	1	0	0
135	1	82	30	1	2	2	2	1	6	4.61	0.45	69	199	4.3	2.07	2.33	35.45	585.4	759.4	10.45	27	1.44	4.31	25.9	1.34	9.39198	2012-07-01	2023-06-30	132	1	0	0
136	2	67	45	1	2	2	2	2	5.83	5.42	0.3	53	216	6.7	1.62	1.92	39.3	1260	428.8	3.25	25	1.65	5.48	25.9	1.22	8.36017	2012-07-01	2023-06-30	132	1	0	0
137	2	56	39	1	1	2	1	1	4.71	1.74	0.34	62	263	4.9	1.61	1.77	39.637	1063.5	650.1	5.05	32	1.45	3.41	21.2	1.25	8.67169	2012-07-01	2023-06-30	132	1	0	0
138	2	56	48	1	2	2	1	1	5.83	4.58	0.64	42	196	4.8	1.39	1.53	34.35	1081	436.3	6.18	33	1.71	2.95	31	1.26	9.03855	2012-07-01	2022-02-21	115	2	1	1	1	4
139	1	48	38	1	2	2	2	1	3.7	3.2	0.22	59	81	8	1.63	1.81	65.18	1464.9	439.1	7.64	31	1.22	4.04	50.1	1.27	8.91298	2012-07-01	2023-06-30	132	1	0	0
140	2	52	32	1	2	2	2	1	13.74	12.83	0.6	101	139	3.2	2.27	2.53	28.52	969	469.5	28.58	27	2.84	4.56	14.2	1.29	11.0772	2012-07-01	2023-06-30	132	1	0	0
141	2	60	134	1	2	2	1	1	6.89	5.84	0.46	66	150	3.47	2.16	2.3	45.65	901.7	460.5	5.63	33	1.89	5.79	23	1.33	9.04542	2012-07-01	2023-06-30	132	1	0	0
142	2	37	37	1	2	2	1	2	3.29	2.75	0.17	64	149	4.3	2.16	2.14	39.87	1164.2	639.6	4.84	41	1.12	5.16	43.1	1.31	8.37098	2012-07-01	2023-06-30	132	1	0	0
143	2	39	50	1	2	2	1	1	4.4	3.9	0.23	45	269	5.7	1.9	1.9	44.06	1124.4	850.3	4.81	40	1.01	2.86	20.4	1.28	8.26138	2012-07-01	2023-06-30	132	1	0	0
144	1	58	63	1	2	2	2	1	6.99	5.37	0.96	98	217	5.4	1.89	2.11	29.6	977.2	509.6	5.94	29	1.61	7.56	22.3	1.26	8.93868	2012-07-01	2023-06-30	132	1	0	0
145	1	49	97	1	2	2	1	1	7.92	6.13	1.3	93	185	4.5	2.11	2.13	27.68	1110	483.8	6.17	39	0.66	4.15	33.7	1.24	8.08492	2012-07-01	2023-06-30	132	1	0	0
146	2	53	73	1	2	2	1	1	5.12	3.69	0.87	87	120	4.8	2.22	2.1	39.97	1209	320.2	5.01	46	1.23	4.42	24.8	1.24	8.49919	2012-07-01	2023-06-30	132	1	0	0
147	1	45	88	1	1	2	1	2	6.85	5.74	0.62	63	106	5.4	1.58	1.56	69.88	1970	658.7	5.76	41	1.49	4.09	43.4	1.28	8.83045	2012-07-01	2023-06-30	132	1	0	0
148	1	40	44	1	2	2	2	1	9.34	7.6	0.74	82	231	4.9	2.25	2.33	28.8	951.7	685.3	5.9	36	0.84	6.01	16.2	1.25	8.28133	2012-07-01	2023-06-30	132	1	0	0
149	1	68	44	1	2	2	1	1	6.06	4.22	1.09	67	129	4.9	1.88	2.16	22.96	905.4	345.2	6.17	26	1.49	5.38	15	1.25	8.89921	2012-07-01	2022-12-24	125	2	1	1	1	1
150	2	49	74	1	2	2	2	2	6.07	4.7	0.96	93	191	4.4	2.33	2.35	22.8	926	524.1	26.05	39	5.38	8.5	25.4	1.22	11.6234	2012-07-01	2023-06-30	132	1	0	0
151	2	65	56	1	2	1	2	2	11.01	10.75	0.09	52	119	5.8	1.55	1.73	90.03	1145.9	661.7	3.34	31	1.94	3.64	18.8	1.23	8.54939	2012-07-01	2023-01-05	126	2	1	1	1	1
152	2	61	76	1	2	2	2	2	4.84	2.91	1.13	62	127	5	1.94	1.96	22.54	762	395.8	9.45	39	1.6	7.93	28.7	1.26	9.39675	2012-07-01	2023-06-30	132	1	0	0
153	1	49	59	1	2	2	2	1	11.33	9.25	0.52	83	277	4.5	1.84	2.08	32.6	1194.1	648.7	4.7	28	0.89	3.52	16.9	1.2	8.11176	2012-07-01	2022-10-30	123	2	1	0	2
154	2	64	91	1	2	2	1	1	7.88	5.62	0.99	80	208	3	1.91	2.05	26.83	869	141	5.44	33	1.17	2.94	17.9	1.21	8.53152	2012-07-01	2022-02-18	115	2	1	0	3
155	1	51	27	1	2	2	1	1	4.77	3.54	0.69	91	184	4.2	1.99	2.29	26.9	578.5	424.3	6.54	25	1.49	6.46	31.6	1.27	8.95745	2012-07-01	2023-06-30	132	1	0	0
156	1	63	29	1	2	2	2	1	9.15	8.2	0.54	101	140	4.5	1.89	2.01	50.21	699.1	322.3	5.33	34	1.71	5.34	28.75	1.26	8.89058	2012-07-01	2023-06-30	132	1	0	0
157	1	62	62	1	2	2	2	2	11.21	10.6	0.22	65	188	4.4	1.86	2.06	39.86	1258	629.7	17.34	30	1.09	4.69	30.2	1.3	9.61993	2012-07-01	2023-06-30	132	1	0	0
158	1	27	74	1	2	2	1	2	8.89	8.04	0.53	49	43	3.9	1.24	1.36	86.52	2538	669.8	7.02	34	1.14	4.08	20.5	1.36	8.76053	2012-07-01	2023-06-30	132	1	0	0
159	2	69	58	1	2	2	2	2	10.12	8.37	0.78	83	179	4.5	1.75	1.83	27.39	777.5	467.9	10.02	36	1.06	5.22	13.6	1.27	9.04359	2012-07-01	2023-06-30	132	1	0	0
160	2	36	72	1	2	2	1	1	7.11	6.06	0.76	56	186	3.8	2.24	2.24	42.75	2454	585.8	6.38	40	1.59	5.02	47.2	1.28	8.99764	2012-07-01	2023-06-30	132	1	0	0
161	1	48	123	1	2	1	2	2	6.81	5.27	0.82	56	190	4.23	1.71	1.85	37.47	1121.5	362.9	4.15	33	1.58	5.83	44	1.22	8.56127	2012-07-01	2023-06-30	132	1	0	0
162	2	61	135	1	2	2	1	1	3.34	2.28	0.68	94	86	5.2	2.06	2.14	48.8	1354	492.8	5.7	36	1	4.22	41.1	1.23	8.4212	2012-07-01	2023-06-30	132	1	0	0
163	1	62	65	1	2	2	2	1	8.95	8.16	0.34	63	345	3.6	1.92	2.1	33.56	768	718.6	4.81	31	0.8	6.65	9.5	1.3	8.02829	2012-07-01	2023-06-30	132	1	0	0
164	2	60	60	1	2	1	2	2	9.46	7.91	0.55	47	220	6.1	1.99	2.17	30.45	590	604.4	6.1	31	0.88	3.68	28.3	1.23	8.36119	2012-07-01	2023-01-05	126	2	1	1	1	2
165	1	50	53	1	2	2	1	1	4.89	3.22	1.13	74	138	4.6	1.96	1.96	48.55	1108	420.2	5.12	40	1.72	4.35	20.6	1.25	8.85621	2012-07-01	2018-11-21	76	2	1	0	2
166	1	33	74	1	1	2	1	1	6.1	4.95	0.73	41	123	4.27	2.08	2.38	32.82	1267.9	398.6	4.99	25	2.07	5.23	21.4	1.26	9.01572	2012-07-01	2018-08-03	73	2	1	1	1	3
167	1	65	12	1	2	2	2	1	11.63	10.37	0.66	44	320	6	2.16	2.28	38.58	1227.1	639.6	11.28	34	1.25	4.13	28.6	1.23	9.32691	2012-07-01	2018-12-31	77	2	1	1	1	1
168	2	53	31	1	2	2	1	1	8.17	7.55	0.23	57	187	5.3	2.49	2.57	50.41	1601.2	609.3	4.86	36	1.81	5.19	36	1.21	8.8551	2012-07-01	2018-12-04	77	2	1	1	1	1
169	2	61	26	1	1	2	1	1	5.5	4.18	0.6	98	231	6.2	1.98	2.02	30.63	1218	520.5	6.1	38	1.41	4.26	22.3	1.3	8.83261	2012-07-01	2019-01-09	78	3	0	0
170	2	50	39	1	2	2	1	1	6.67	5.9	0.32	73	41	7.3	1.2	1.36	35.75	1633	754.6	10.43	32	0.88	4.84	45.9	1.21	8.89759	2012-07-01	2019-04-25	81	4	0	0
171	2	59	38	1	2	2	1	1	7.31	5.73	0.99	56	190	3.3	1.82	1.84	48.5	1431	604.5	6.08	39	1.23	4.9	36.6	1.2	8.69275	2012-07-01	2019-08-02	85	4	0	0
172	1	55	34	1	2	2	1	1	14.8	12.81	1.11	49	173	4.1	1.86	2.08	38.86	832.7	632.1	5.98	29	2.44	3.44	21.3	1.25	9.36115	2012-07-01	2019-01-14	78	2	1	1	1	2
173	2	50	6	1	2	2	2	2	4.04	3.02	0.32	70	147	5.3	1.76	1.96	22.22	709.3	523.1	3.51	30	1.58	3.78	30	1.27	8.39378	2012-07-01	2018-12-31	77	4	0	0
174	1	27	68	1	1	2	1	1	9.95	8.49	0.6	71	131	4.45	1.49	1.65	59.7	2234	373.2	5.69	32	1.13	4.1	32.8	1.26	8.54166	2012-07-01	2018-12-31	77	4	0	0
175	1	22	13	1	1	2	1	1	6.31	4.54	1.33	76	185	3.9	2.11	2.13	34.1	1607	657	5.46	39	1.83	5.46	36.8	1.37	8.9825	2012-07-01	2018-08-15	73	3	0	0
176	2	48	12	1	2	2	1	1	8.04	7.01	0.69	78	149	5.2	1.46	1.44	35.33	1376.3	590.6	6.03	41	1.53	6.23	27.1	1.24	8.90275	2012-07-01	2019-03-25	80	4	0	0
177	1	53	35	1	2	2	1	1	9.68	7.92	0.75	38	172	6	1.97	2.19	65.16	1712	598.2	4.23	29	3.07	5.52	32.3	1.21	9.24462	2012-07-01	2019-04-28	81	2	1	1	1	2
178	2	67	36	1	2	2	1	1	7.68	5.73	1.27	88	198	4.7	1.63	1.67	41.76	1132.5	560.9	5.34	38	1.42	6.83	35.9	1.2	8.70662	2012-07-01	2019-01-09	78	2	1	1	1	4
179	2	72	28	1	2	2	1	1	11.3	9.23	0.88	67	108	4.8	1.55	1.63	28.35	1404.8	455.2	8.58	36	1.33	4.63	24.4	1.23	9.11535	2012-07-01	2018-08-13	73	2	1	1	1	2
180	1	24	53	1	2	1	1	1	6.5	5.2	0.8	75	157	3.9	1.85	1.99	44.64	1304	813.5	5.73	33	1.47	5.4	19.5	1.28	8.81171	2012-07-01	2018-12-29	77	4	0	0
181	1	51	34	1	2	2	2	2	3.58	2.78	0.51	105	208	3.7	2.46	2.88	24.81	532	560.7	10.6	19	2.73	4.5	27.8	1.24	10.0459	2012-07-01	2019-05-09	82	2	1	0	2
182	2	30	9	1	1	2	1	1	5.99	5.13	0.51	48	140	4.5	2.12	2.12	43.66	1364.81	496.4	5.34	40	1.8	4.88	35.9	1.25	8.94375	2012-07-01	2018-12-31	77	4	0	0
183	2	81	22	1	2	2	2	1	11.64	9.55	0.85	105	276	3.2	1.93	2.17	25.16	1004.9	570.1	7.38	28	0.99	2.63	27.2	1.19	8.66946	2012-07-01	2019-08-31	85	2	1	0	3
184	1	21	32	1	1	2	1	1	12.84	10.45	1.31	70	135	3.2	1.41	1.65	56	2468	825.2	7.81	28	0.98	3.51	41.1	1.27	8.71594	2012-07-01	2019-01-20	78	4	0	0
185	1	67	11	1	2	2	1	1	6.17	4.93	0.41	57	381	4.4	1.92	1.96	31.62	832.6	557.7	6.46	38	1.25	3.45	22.8	1.23	8.76951	2012-07-01	2019-02-14	79	4	0	0
186	1	61	26	1	1	2	1	2	6.14	5.14	0.14	59	181	5.7	1.87	2.09	38.37	770	463.4	4.99	29	0.55	3.17	20	1.21	7.69033	2012-07-01	2019-05-30	82	2	1	1	1	4
187	2	48	8	1	2	2	2	1	14.89	13.82	0.42	56	413	4.7	1.95	2.17	16.42	426.4	394.6	13.04	29	1.35	5.42	6.2	1.17	9.54886	2012-07-01	2018-10-02	75	5	0	0
188	2	59	4	1	1	2	1	1	6.23	4.28	1.41	101	269	4.4	2.34	2.2	37.3	1418.1	615.4	5.32	47	3.79	8.46	29.7	1.21	9.68457	2012-07-01	2018-12-30	77	4	0	0
189	1	61	14	1	2	2	2	1	6.53	4.69	0.69	86	204	4.5	1.79	2.05	37.44	1090.1	684.6	9.41	27	0.7	4.62	26	1.2	8.56583	2012-07-01	2019-02-18	79	2	1	0	2
190	1	59	15	1	2	2	1	2	4.44	3.49	0.58	59	83	4.5	1.5	1.56	49.83	2059.7	655.8	4.73	37	1.34	2.79	42.9	1.21	8.52733	2012-07-01	2018-10-21	75	2	1	1	1	2
191	1	75	5	1	1	2	2	1	10.9	9.15	0.57	52	180	6	1.94	1.9	22.39	542.8	298.2	9.55	42	0.5	3.13	22.3	1.21	8.24413	2012-07-01	2018-08-01	73	2	1	0	4
192	2	54	30	1	1	2	1	1	4.02	2.77	0.8	56	144	5.9	1.34	1.44	28.9	1322	503.9	4.83	35	3.38	5.19	31	1.26	9.47346	2012-07-01	2018-12-28	77	4	0	0
193	1	51	63	1	2	2	2	1	9.71	8.66	0.5	49	255	4.3	2.21	2.49	62.71	2402	1292.1	7.23	26	0.84	3.8	23.5	1.23	8.48462	2012-07-01	2018-12-12	77	4	0	0
194	1	55	15	1	1	2	1	1	6.26	5.36	0.34	36	95	7.2	1.71	1.89	58.28	1800.3	787.6	6.23	31	1.73	5.08	22.2	1.28	9.05823	2012-07-01	2019-08-07	85	2	1	0	4
195	1	62	32	1	2	2	2	1	7.36	5.56	0.98	77	179	6.2	1.97	2.15	40.93	874.1	575.3	3.82	31	1.59	4.6	31.9	1.24	8.48472	2012-07-01	2017-09-12	62	2	1	1	1	1
196	1	49	28	1	1	2	1	1	5.35	3.62	0.86	71	119	3.5	1.78	2.1	28.62	1051	580.3	7.73	24	1.48	6.73	20.8	1.23	9.11789	2012-07-01	2018-01-14	66	2	1	1	1	4
197	2	72	57	1	2	2	2	1	11.49	9.63	1.15	97	213	4.09	1.8	2.08	22.01	724.2	542.1	9.71	26	1.42	3.08	24.1	1.2	9.30455	2012-07-01	2018-03-21	68	2	1	1	1	2
198	2	56	19	1	1	2	1	2	9.04	7.9	0.64	76	168	4.9	1.83	1.99	30.18	1098	689.7	5.33	32	1.72	5.86	28.3	1.27	8.89641	2012-07-01	2017-12-31	65	4	0	0
199	1	64	65	1	2	2	2	2	7.15	5.18	0.86	68	217	4.4	2.14	2.22	25.5	745.2	528.1	7.02	36	1	3.92	35.4	1.22	8.6295	2012-07-01	2019-04-19	81	2	1	0	2
200	2	48	69	1	2	1	2	2	6.01	4.92	0.83	72	222	7.01	2.08	2.34	36.58	1449.2	394.2	8.34	27	2.26	7.16	23.3	1.23	9.61716	2012-07-01	2017-11-19	64	2	1	1	1	2
201	1	73	49	1	2	2	2	1	10.3	8.3	1.5	95	157	3.9	1.98	2.02	23.23	746	412.5	7.27	38	1.93	6.05	37.9	1.25	9.32201	2012-07-01	2018-05-03	70	2	1	1	1	4
202	1	59	53	1	2	2	1	1	19.19	17.33	0.55	45	221	6.4	2.04	2.24	50.99	1024	949.4	17.79	30	2.84	3.33	29.4	1.24	10.6032	2012-07-01	2018-05-18	70	2	1	0	4
203	2	75	21	1	2	2	1	2	6.26	5.77	0.22	45	271	5	1.46	1.66	52.35	1302	616.5	7.53	30	1.44	3.9	33.6	1.25	9.06427	2012-07-01	2018-02-05	67	2	1	1	1	4
204	1	39	38	1	2	2	1	1	14.62	12.88	0.95	68	166	4.4	2.13	2.21	48.37	1311	935.5	10.24	36	1.71	5.65	18.3	1.27	9.54353	2012-07-01	2018-02-06	67	2	1	1	1	2
205	1	48	27	1	1	2	1	1	8.09	6.95	0.57	38	160	5.6	1.47	1.61	65.9	1789	940.7	6.69	33	1.13	3.76	26	1.23	8.70357	2012-07-01	2018-05-10	70	2	1	1	1	5
206	2	61	47	1	2	2	1	1	4.8	3.73	0.52	58	121	5.2	1.76	1.88	32.34	934	632.1	5.22	34	1.24	4	33	1.18	8.54834	2012-07-01	2018-05-21	70	4	0	0
207	1	53	27	1	2	2	2	1	6.07	5.3	0.37	55	89	8.4	1.98	2.18	35.08	645	387.9	14.33	30	0.61	2.34	13.2	1.21	8.84879	2012-07-01	2018-02-01	67	2	1	1	1	4
208	2	54	74	1	2	2	1	1	14.08	12.01	1.07	81	346	3.76	1.89	2.09	44.47	1403	746.5	8.82	30	1.53	4.17	31.2	1.21	9.28303	2012-07-01	2018-08-14	73	2	1	0	4
209	1	56	5	1	1	2	1	1	7.12	5.39	0.63	90	210	3.1	2.2	2.36	67	1924	748.2	7	32	1.35	2.94	26.1	1.27	8.92675	2012-07-01	2017-11-12	64	2	1	0	2
210	1	52	47	1	2	2	2	1	5.68	4.53	0.72	82	204	4.2	2.02	2.36	23.59	705	479.1	10.42	23	1.64	5.73	15.7	1.25	9.51916	2012-07-01	2021-06-15	107	2	1	1	1	4
211	1	70	31	1	1	2	1	1	6.26	3.83	0.96	60	145	5.1	1.84	1.88	39.33	1019.5	567.3	5.44	38	0.74	4.27	28.8	1.2	8.07341	2012-07-01	2017-12-30	65	4	0	0
212	1	20	48	1	2	1	2	1	3.58	2.12	1.02	80	67	4.8	1.16	1.32	34.25	1619.2	317.1	7.46	32	0.45	2.49	14.8	1.25	7.89178	2012-07-01	2017-12-31	65	4	0	0
213	2	68	42	1	2	1	2	1	5.23	4.26	0.63	58	88	5.1	1.28	1.36	44.33	1479	629.1	6.45	36	2.03	5.6	43.5	1.27	9.25285	2012-07-01	2018-05-23	70	2	1	1	1	2
214	1	40	19	1	2	2	1	1	19.45	16.11	0.83	77	210	3.2	1.93	2.01	35.22	934.4	838.6	5.32	36	1.33	4.85	19.2	1.18	8.63739	2012-07-01	2017-08-30	61	2	1	1	1	2
215	1	52	13	1	2	2	2	1	5.19	3.85	0.72	82	189	5.4	2.02	2.1	20.41	803	305.9	7.88	36	1.12	4.17	33.5	1.25	8.85839	2012-07-01	2017-12-31	65	2	1	1	1	1
216	1	73	27	1	2	2	1	1	11.2	9.3	1.1	58	209	5.3	1.87	2.01	26.53	809	497	6.17	33	0.64	3.43	28.1	1.26	8.05415	2012-07-01	2017-02-17	55	2	1	0	4
217	1	60	61	1	2	2	2	1	8.8	7.5	0.6	69	167	3.4	1.8	2.02	51.8	982	745	12.49	29	2.33	5.2	31.6	1.22	10.0515	2012-07-01	2017-04-02	57	2	1	1	1	2
218	1	76	57	1	2	2	2	1	18.4	16.1	0.9	83	262	6.9	1.95	2.03	28.7	738	486.8	14.5	36	1.45	3.46	24.8	1.25	9.72645	2012-07-01	2017-06-24	59	2	1	1	1	4
219	2	44	7	1	2	2	1	1	6.91	5.8	0.42	82	153	6.4	1.81	2.03	41.73	932	794.1	8.53	29	5.72	6.34	25.8	1.21	10.5683	2012-07-01	2017-05-04	58	2	1	1	1	4
220	2	63	47	1	2	2	1	1	2.6	1.6	0.6	40	94	3.75	2.03	2	31.64	1153.3	595	4.33	41.5	1.32	3.76	36.7	1.2	8.42393	2012-07-01	2017-08-27	61	2	1	0	2
221	2	53	3	1	1	2	2	1	7.94	6.71	0.43	56	169	4.4	1.75	1.87	37.25	1210	481.3	8.25	34	1.94	4.42	24.4	1.2	9.45364	2012-07-01	2017-12-31	65	2	1	1	1	4
222	1	72	3	1	2	2	1	1	6.84	5.6	0.48	86	127	4	2.27	2.17	29.59	1468	713	9.74	45	1.32	2.54	44.7	1.24	9.23461	2012-07-01	2016-10-18	51	2	1	0	4
223	1	39	28	1	1	2	1	1	7.51	4.99	0.96	60	219	4.4	2.01	2.15	37.04	1109	780.4	4.02	33	0.54	3.2	19.4	1.19	7.45583	2012-07-01	2016-12-30	53	4	0	0
224	1	27	45	1	2	1	1	1	4.19	3.27	0.79	51	153	3.5	1.63	1.628	61.2	2220.8	573.6	7.4	40.1	0.37	2.19	26.4	1.25	7.68796	2012-07-01	2016-12-29	53	4	0	0
225	2	51	23	1	2	2	2	1	14.32	12.48	0.96	82	260	3.9	1.78	2.12	29.16	769	518.4	7.72	23	2.04	9.36	15.6	1.24	9.4375	2012-07-01	2016-12-30	53	2	1	0	4
226	2	43	24	1	2	1	1	1	4.39	3.49	0.38	62	266	5.4	1.54	1.54	37.35	1324.6	627	4.81	40	1.33	4.83	32.1	1.22	8.53661	2012-07-01	2016-12-31	53	4	0	0
227	1	57	7	1	2	2	1	1	16.1	14.2	0.5	89	330	7.1	1.35	1.51	41.41	776.5	940	5.75	32	1.21	3.43	17.3	1.24	8.62056	2012-07-01	2016-02-12	43	4	0	0
228	1	64	15	1	2	2	2	1	7.07	5.16	1.07	67	173	4.3	1.6	1.72	25.76	1024	433.4	10.43	34	1.82	5.25	18	1.23	9.62426	2012-07-01	2016-03-15	44	2	1	1	1	1
229	2	64	46	1	2	2	2	1	5.51	4.52	0.51	63	84	4.88	1.59	1.79	42.51	1031.2	388.6	4.95	30	1.14	4.26	25.4	1.2	8.41115	2012-07-01	2016-03-20	44	2	1	1	1	1
230	1	68	24	1	2	2	2	1	7.9	6.8	0.6	56	138	4.2	1.79	2.17	26.5	863.1	577.8	10.47	21	0.65	3.55	26.5	1.21	8.59847	2012-07-01	2016-05-05	46	2	1	0	4
231	2	60	15	1	2	2	2	1	3.88	2.87	0.29	75	172	3.9	1.9	2.08	27.28	703.9	532.6	6.41	31	1.28	7.12	26.9	1.23	8.78545	2012-07-01	2016-05-17	46	2	1	1	1	1
232	1	51	40	1	1	2	2	1	8.7	6.3	1.5	69	279	5.2	2.07	2.13	17.3	707	430.5	4.79	37	1.04	3.78	38.3	1.2	8.28649	2012-07-01	2016-07-18	48	2	1	1	1	1
233	2	62	12	1	1	2	1	1	6.51	4.94	1.01	98	92	5.4	2	2.04	31.59	1370	450	5.16	38	1.1	5.33	40.8	1.25	8.41698	2012-07-01	2016-09-23	50	4	0	0
234	1	69	3	1	2	1	2	1	14.5	12.81	0.58	59	125	8.3	2.05	2.21	30.29	987	640.3	2.61	32	1.12	4.66	43.6	1.18	7.75341	2012-07-01	2017-12-31	65	4	0	0
235	2	49	3	1	2	2	1	1	9.87	7.46	1.6	66	310	4.6	2.02	2.4	11.61	283	406.4	10.2	21	2.54	6.71	15.9	1.22	9.93529	2012-07-01	2017-12-31	65	2	1	1	1	1
236	1	52	10	1	2	2	2	1	8.31	6.77	0.94	68	194	4	2.22	2.22	57.66	1489.5	661.2	7.34	40	2.65	5.46	32	1.25	9.64863	2012-07-01	2018-12-09	77	4	0	0
237	1	53	12	1	2	2	2	1	12.67	10.73	0.84	77	687	4.8	1.84	2.04	17.18	482	425.7	7.14	30	1.08	3.48	19.6	1.24	8.72341	2012-07-01	2019-03-22	80	2	1	0	4
238	1	74	6	1	2	2	2	1	7.36	5.54	0.85	65	268	3.3	1.89	2.23	15.99	483	452.5	6.46	23	0.83	4.05	21.9	1.21	8.36004	2012-07-01	2018-03-22	68	2	1	1	1	4
239	1	37	7	1	1	2	1	1	7.48	6.59	0.61	75	56	6.1	1.36	1.48	46.84	1825.1	553.5	10.36	34	0.93	3.14	18.9	1.36	8.94612	2012-07-01	2019-05-21	82	3	0	0
240	2	63	5	1	2	2	1	1	12.59	11.54	0.45	57	234	5.3	1.77	1.93	30.47	712.2	591.6	5.8	32	1.17	3.58	26	1.21	8.5956	2012-07-01	2019-12-24	89	2	1	1	1	2
241	1	57	9	1	1	2	1	1	4.63	4.42	0.13	59	157	4.9	2.25	2.39	68.74	1988	751.4	7.35	33	2.8	5.8	28.75	1.25	9.70506	2012-07-01	2018-06-29	71	2	1	1	1	2
242	1	54	19	1	2	2	2	1	8.26	8.01	0.18	84	273	5	2.1	0.28	40.5	1602.3	709.5	5.77	26	1.18	6.27	32.1	1.18	8.59892	2012-07-01	2021-04-07	105	2	1	1	1	2
243	1	62	4	1	2	2	1	1	1.69	1.01	0.36	65	58	4.6	2.08	2.14	32.43	1385	558.1	4.43	37	0.75	2.53	28.5	1.21	7.88145	2012-07-01	2021-04-13	105	4	0	0
244	2	33	19	1	2	2	1	1	25.41	24.27	0.42	54	338	4.2	0.98	1.14	67.48	1987.4	771.8	10.5	32	1.5	4.03	21.6	1.24	9.43758	2012-07-01	2020-03-29	92	2	1	1	1	4
245	2	81	25	1	2	2	2	1	8.71	7.73	0.78	66	316	3.9	1.57	1.81	23.36	587	613.9	16.97	28	1.38	5.11	21.3	1.23	9.83427	2012-07-01	2020-09-06	98	2	1	1	1	1
246	2	75	30	1	2	2	2	1	9.32	7.24	1.55	67	226	4.4	1.66	2	36.49	956	722.1	7.88	23	2.15	3.81	26	1.27	9.51053	2012-07-01	2019-12-31	89	2	1	1	1	1
247	2	81	47	1	2	2	2	2	9.43	8.27	0.69	104	355	3.7	1.63	2.01	23.45	900	593.9	11.71	21	1.64	10.99	19.4	1.25	9.63587	2012-07-01	2021-01-26	102	2	1	1	1	1
248	1	58	18	1	2	2	2	2	12.17	10.63	0.42	52	288	5.5	1.78	2.06	45.98	808.6	581.1	18.5	26	3.9	2.71	25.8	1.22	10.9595	2012-07-01	2020-07-28	96	4	0	0
249	2	63	64	1	2	2	2	2	3.81	2.68	0.65	59	181	4.7	2.85	2.77	32.68	866	466.9	5.47	44	1.1	3.29	38	1.23	8.47532	2012-07-01	2021-06-04	107	2	1	1	1	4
250	1	67	62	1	1	2	1	1	12.41	11.89	0.25	46	270	5.3	1.9	1.8	42.48	1490.7	547.1	7.21	45	1.54	4.89	36.7	1.24	9.08799	2012-07-01	2021-01-02	89	2	1	0	4
251	2	65	29	1	2	2	2	1	14.1	12.24	0.83	73	251	4	1.91	2.15	20.45	519	525.7	8.1	28	1.31	4.7	18.8	1.23	9.04263	2012-07-01	2019-11-02	88	2	1	1	1	4
252	2	51	33	1	1	2	1	2	10.86	10.43	0.1	24	120	5.2	1.07	1.29	84.84	2042	947.7	7.85	29	2.16	3.05	53.9	1.24	9.51136	2012-07-01	2019-12-31	89	4	0	0
253	1	65	10	1	2	2	2	1	17.99	16.91	0.82	68	284	6.5	2.16	2.32	55.21	1505.9	538.4	4.01	32	2.49	2.35	47.1	1.2	8.98181	2012-07-01	2019-12-16	89	4	0	0
254	1	34	20	1	2	2	2	1	6.55	4.37	1.38	71	196	3.5	1.83	1.89	43.92	1628.3	876.1	4.61	37	1.8	5.11	22.2	1.23	8.79675	2012-07-01	2020-11-22	100	4	0	0
255	2	65	16	1	2	2	2	1	6.86	5.41	0.92	65	131	4.5	2.11	2.13	27.5	1162.9	482.3	6.13	39	1	6.16	42.4	1.2	8.49393	2012-07-01	2019-12-27	89	4	0	0
256	1	62	33	1	1	2	2	1	5.8	4.08	1.09	95	345	5.2	2.12	2.38	24.93	585.2	703.7	5.82	27	0.65	3.22	16.8	1.18	8.01125	2012-07-01	2019-10-15	87	2	1	0	2
257	2	80	35	1	2	2	1	2	4.1	2.57	0.58	67	161	5	2.14	2.16	34.33	833	367.2	4.55	39	0.26	28	31.4	1.17	6.84879	2012-07-01	2021-04-22	105	2	1	0	3
258	2	63	31	1	2	2	2	2	14.12	10.81	1.93	113	301	4	2.24	2.42	31.75	655	530.6	9.91	31	4.41	10.04	16.9	1.23	10.4582	2012-07-01	2019-10-20	87	2	1	1	1	1
259	1	30	95	1	2	2	1	1	8.47	5.46	1.55	79	226	6.13	1.93	1.97	71.8	1204	562.6	5.69	38	0.82	1.94	20.1	1.21	8.22099	2012-07-01	2019-12-08	89	4	0	0
260	1	57	63	1	2	2	1	1	4.94	3.14	1.23	53	109	4.1	1.98	2.12	40	1614.9	323	5.06	33	0.97	3.95	15.7	1.17	8.27164	2012-07-01	2019-07-30	108	2	1	1	1	1
261	2	70	45	1	2	1	1	2	4.23	4.03	0.18	70	92	7.2	1.75	1.89	55.86	1367	627.5	7.02	33	0.92	3.98	37.6	1.2	8.54612	2012-07-01	2019-11-13	88	2	1	0	2
262	2	82	24	1	2	2	1	1	5.44	4.83	0.39	49	135	5.2	2.19	2.25	36.79	731	470.3	5.73	37	1.04	3.28	56.1	1.21	8.46567	2012-07-01	2021-07-10	108	2	1	0	3
263	1	75	30	1	2	2	1	1	4.15	3.64	0.18	79	91	5.2	1.45	1.65	49.17	1088	622.3	7.69	30	1.22	3.35	44.2	1.24	8.91951	2012-07-01	2020-02-11	91	2	1	1	1	2
264	2	64	34	1	1	2	2	1	21.16	19.78	0.49	91	216	5.6	2.06	2.14	34.28	820.6	756.3	14.93	36	2.38	4.27	30.3	1.23	10.2512	2012-07-01	2020-11-24	100	2	1	1	1	1
265	1	44	3	1	2	2	2	1	4.56	3.12	0.58	95	184	3.8	1.83	1.87	37.13	1054.7	555.8	4.4	38	1	3.25	27.9	1.2	8.16234	2012-07-01	2019-08-18	85	4	0	0
266	1	43	45	1	2	2	1	1	17.77	15.97	0.54	65	161	5.1	1.84	2	44.07	688.9	791.5	6.99	32	0.99	4.08	7.3	1.22	8.61517	2012-07-01	2019-10-23	87	2	1	1	1	2
267	2	59	10	1	2	2	1	1	4.94	4.24	0.15	62	103	3.9	1.86	1.64	50.62	2107.4	706.2	2.7	51	2.67	5.87	25.5	1.2	8.65607	2012-07-01	2019-12-05	89	2	1	1	1	4
268	1	58	40	1	2	2	1	1	14.42	13.74	0.29	48	158	5.2	1.23	1.57	63	676	507.1	11.98	23	1.09	3.14	16.5	1.24	9.25015	2012-07-01	2019-07-01	84	2	1	1	1	4
269	2	54	17	1	2	2	2	1	8.63	8.03	0.17	46	165	5.3	1.62	1.8	68.01	1727.2	812.8	4.22	31	1.15	4.51	40.1	1.21	8.26033	2012-07-01	2019-12-24	89	4	0	0
270	1	74	12	1	2	2	1	1	6.69	5.76	0.35	111	205	4	1.82	1.82	25.42	662.7	643.2	6.72	40	1.2	4.84	42.7	1.23	8.76815	2012-07-01	2020-02-24	91	4	0	0
271	1	64	9	1	2	2	2	1	11.56	10.23	0.87	79	260	2.8	1.81	2.17	17.96	360.8	505	18.67	22	1.81	8.76	18.5	1.24	10.201	2012-07-01	2019-12-16	89	4	0	0
272	2	56	75	1	2	2	2	1	10.66	9.31	0.52	86	393	3.5	1.86	2	23.49	965	533	9.4	33	1.41	4.64	23.4	1.26	9.26503	2012-07-01	2021-07-15	108	2	1	1	1	2
273	2	46	67	1	2	2	1	1	6.2	5.05	0.83	76	157	6.2	1.75	1.97	20.52	1165	785.6	8.72	29	1.19	5.02	21.9	1.22	9.02031	2012-07-01	2021-03-04	104	2	1	1	1	2
274	1	58	108	1	2	2	1	1	4.72	3.81	0.66	74	118	5.9	2.29	2.29	43.5	1160	507.5	10.64	40	2.36	4.16	32	1.23	9.90402	2012-07-01	2021-02-25	103	2	1	0	3
275	1	54	85	1	2	2	2	1	8.27	5.97	1.2	88	230	4.1	1.9	2.2	18.93	804.6	384	8.02	25	0.96	8.21	14.2	1.25	8.72185	2012-07-01	2021-01-26	102	3	0	0
276	1	66	26	1	2	2	2	1	5.76	5.33	0.33	65	220	2.5	2.04	2.26	21.47	398.1	635.1	9.43	29	2.58	5.42	27.2	1.23	9.87242	2012-07-01	2020-03-02	92	2	1	1	1	3
277	1	80	33	1	2	2	1	2	12.17	11.14	0.38	127	165	7.8	2.19	2.57	49.54	779	649.5	10.97	21	1.57	2.82	23.3	1.25	9.52698	2012-07-01	2019-06-21	83	2	1	0	2
278	2	65	79	1	2	2	2	1	7.84	6.01	0.93	88	302	4.1	2.02	2.12	20.84	658.2	428.7	11.26	35	1.67	5.46	36.9	1.24	9.61482	2012-07-01	2020-08-31	97	2	1	1	1	4
279	2	61	33	1	2	2	2	1	11.33	9.44	0.63	66	277	3.6	1.79	1.97	16.49	689.7	498	6.21	31	2.15	7.43	34.2	1.21	9.27236	2012-07-01	2021-07-09	108	2	1	1	1	2
280	2	52	23	1	2	2	2	2	8.14	6.57	1.05	47	213	4.8	2.52	2.62	42.45	777.8	431.8	6.74	35	1.86	3.75	32.5	1.22	9.20937	2012-07-01	2019-12-24	89	4	0	0
281	2	72	19	1	2	2	2	2	10.23	7.88	1.1	85	270	4.4	2.4	2.5	44.15	1006.9	509.9	13.95	35	3.5	4.09	50.4	1.2	10.569	2012-07-01	2020-06-16	95	2	1	1	1	1
282	1	54	35	1	2	2	2	2	5.45	3.96	0.88	87	188	4.3	3.03	3.11	49.74	1000.3	536.3	6.89	36	1.62	4.66	38.9	1.22	9.09323	2012-07-01	2021-03-06	104	2	1	0	3
283	2	74	11	1	2	2	2	2	26.69	25.23	0.37	106	299	4.8	2.05	2.27	40.83	717.8	678.7	48.55	29	5.33	5.36	24.4	1.19	12.2367	2012-07-01	2019-12-11	89	2	1	0	2
284	2	58	60	1	2	2	1	1	7.7	5.8	0.85	102	223	6.1	1.99	2.03	32.51	1195.6	435	5.56	38	1.01	4.15	41.4	1.21	8.40628	2012-07-01	2019-11-19	88	2	1	1	1	2
285	2	59	14	1	2	1	1	1	6.33	4.33	1.12	93	341	3.7	1.97	2.23	29.16	484.9	525.2	3.69	27	2.28	7.37	25.5	1.2	8.81054	2012-07-01	2020-04-09	93	2	1	1	1	2
286	1	64	25	1	2	2	2	1	10.72	8.07	1.53	65	276	4.9	1.9	1.94	25.57	815.6	518.5	11.69	38	3.24	7.96	45.5	1.16	10.315	2012-07-01	2021-02-05	103	2	1	1	1	1
287	1	53	32	1	2	2	2	1	11.74	8.6	1.44	67	272	3.8	2.03	2.33	19.9	352.4	446.2	7.04	25	0.92	6.6	14.3	1.2	8.54896	2012-07-01	2020-12-28	101	2	1	1	1	4
288	2	41	87	1	1	2	1	1	7.4	6.1	0.9	63	180	3.7	1.92	2.02	26.21	1101	537.4	5.27	35	0.64	3.58	23.5	1.21	7.89648	2012-07-01	2021-04-30	105	2	1	1	1	2
289	1	19	36	1	2	2	1	1	7.38	4.58	1.9	66	113	7.2	1.64	1.94	36.25	1474.9	737.1	5.34	25	2.5	6.79	33.2	1.28	9.27225	2012-07-01	2021-05-21	106	4	0	0
290	1	39	94	1	2	2	1	1	5	3.2	1.4	53	133	4.3	1.81	2.03	63.5	2803	697.8	4.96	29	1.26	3.06	24.1	1.21	8.51325	2012-07-01	2020-06-03	95	2	1	1	1	2
291	2	64	25	1	2	2	2	2	9.46	7.63	0.87	63	286	3.8	1.93	2.01	30.03	685.4	434.6	6.55	36	1.99	6.69	29	1.23	9.24834	2012-07-01	2020-03-18	92	2	1	1	1	1
292	2	60	7	1	2	2	1	1	7.18	4.5	1.58	97	200	2.5	2.09	2.27	29.38	988.4	898.5	5.98	31	3.41	4.3	26.7	1.21	9.69587	2012-07-01	2019-08-13	85	4	0	0
293	1	72	25	1	2	2	2	1	14.33	12.63	0.76	60	351	4.8	2	2.26	33.01	675.1	627.1	10.61	27	0.61	3.7	15.2	1.21	8.54824	2012-07-01	2020-08-26	97	2	1	0	2
294	1	79	40	1	2	2	1	1	5.68	5.5	0.11	47	136	4.9	2.21	2.33	44.25	879	478.6	9.15	34	0.51	3.67	27.4	1.22	8.22114	2012-07-01	2020-02-29	91	2	1	1	1	4
295	1	56	39	1	2	2	2	2	4.91	3.55	0.87	70	241	4.3	2.16	2.36	19.75	716.8	307.7	11.4	30	1.43	4.11	16.6	1.23	9.47202	2012-07-01	2021-02-21	103	2	1	0	3
296	1	48	33	1	2	2	2	1	7.77	5.45	1.07	125	150	4	2.13	2.25	24.37	674.9	446.4	9.5	34	1.07	5.71	27.9	1.23	8.99969	2012-07-01	2021-05-01	106	2	1	1	1	2
297	1	45	39	1	2	2	1	1	9.63	8	1	91	189	4.1	1.85	1.99	36.39	1120	657.5	10.99	33	1.98	4.46	36.6	1.24	9.76082	2012-07-01	2019-12-19	89	4	0	0
298	2	59	21	1	2	2	2	2	8.02	7.48	0.33	96	210	6.8	1.73	1.93	24.44	1152.4	481.2	5.22	30	1.4	5.07	21.3	1.16	8.66971	2012-07-01	2019-12-31	89	4	0	0
299	2	64	37	1	2	2	2	1	5.76	5.02	0.48	63	98	6.9	2.14	2.18	42	1187	412.7	6.57	38	1.65	3.8	22.1	1.26	9.06402	2012-07-01	2019-12-19	89	2	1	1	1	4
300	1	66	71	2	2	2	2	1	5.31	3.52	1.41	78	152	2.8	1.85	2.31	11.03	373.1	206	5.65	27	1.3	8.97	10.6	1.3	8.67476	2012-07-01	2023-06-30	132	1	0	0
301	1	63	37	2	2	2	1	1	6.72	5.94	0.33	60	168	4.4	1.74	1.86	24.86	1219	669.4	3.64	34	1.47	7.87	30.2	1.32	8.35798	2012-07-01	2023-06-30	132	1	0	0
302	1	47	60	2	2	2	1	1	8.62	6.84	0.97	91	407	4.2	2.26	2.24	30	946.7	355.3	5.77	41	0.59	2.24	25.8	1.23	7.90577	2012-07-01	2023-06-30	132	1	0	0
303	2	26	75	2	1	2	1	1	4.64	3.99	0.33	81	131	5	2	2.3	35.57	1225	736.2	5.21	25	1.38	6.36	19.6	1.28	8.6534	2012-07-01	2023-06-30	132	1	0	0
304	1	51	55	2	2	1	1	1	5.19	3.7	1.03	105	265	3.2	2.72	2.68	43.93	913.7	593.2	5.62	42	4.9	4.48	22.4	1.31	9.9963	2012-07-01	2023-06-30	132	1	0	0
305	2	56	47	2	2	2	2	2	5.37	4.47	0.48	71	159	3.3	1.97	2.19	7.06	349.9	299.9	4.11	29	1.39	3.99	10.8	1.24	8.42346	2012-07-01	2023-06-30	132	1	0	0
306	2	63	55	2	2	2	2	1	7.34	5.34	0.86	64	193	4.5	2.34	2.3	37.52	865.7	313.1	6.19	42	1.95	4.74	36.6	1.21	9.1715	2012-07-01	2023-06-30	132	1	0	0
307	1	50	31	2	2	1	2	1	11.87	9.38	0.97	60	168	6.4	2.04	2.32	29.67	621.1	554.2	5.63	26	1.19	5.16	21.7	1.21	8.5828	2012-07-01	2023-06-30	132	1	0	0
308	1	54	105	2	2	2	1	1	9.4	6.7	2	103	177	3.8	2.37	2.35	20.13	811	261.1	6.49	41	1.71	5.59	34.1	1.22	9.08749	2012-07-01	2023-06-30	132	1	0	0
309	1	47	111	2	2	1	1	1	7.12	5	1.22	80	255	3.5	1.97	2.15	19.7	904.1	389.7	5.33	31	0.83	4.11	23.1	1.24	8.16776	2012-07-01	2023-06-30	132	1	0	0
310	2	30	50	2	1	2	2	1	11.04	8.71	1.32	73	411	4.4	1.89	2.01	18.59	769.5	536	10.66	34	2.07	4.03	28.6	1.35	9.77478	2012-07-01	2023-06-30	132	1	0	0
311	2	57	51	2	1	2	1	2	11.34	9.3	0.94	83	285	4.8	2.36	2.38	17.38	895.3	235.3	9.14	39	2.12	4.66	9.4	1.23	9.64481	2012-07-01	2023-06-30	132	1	0	0
312	1	49	24	2	2	2	1	1	5.23	3.65	0.93	89	232	4.2	2.15	2.95	21.98	530.6	537.4	7	33.5	2.15	3.76	22.9	1.38	9.39211	2012-07-01	2021-09-16	110	4	0	0
313	1	23	127	2	2	2	1	2	14.26	12.34	0.85	100	192	3.68	1.93	2.03	30.46	942.3	613.2	5.37	35	1.47	6.67	28.1	1.26	8.74683	2012-07-01	2023-06-30	132	1	0	0
314	1	72	62	2	2	2	1	1	7.1	5.14	0.65	90	244	3.9	2.56	2.68	13.41	717	462.7	6.5	34	1.26	4.37	22.3	1.24	8.78365	2012-07-01	2022-04-12	117	2	1	1	1	4
315	1	29	73	2	2	2	1	1	9.55	7.54	1.09	73	198	4.7	2.31	2.33	21.98	1486	443.5	5.59	39	1.25	3.53	13.5	1.22	8.62486	2012-07-01	2023-06-30	132	1	0	0
316	2	49	104	2	1	2	1	2	6.4	5	0.7	65	102	3.5	2.05	2.35	7.8	452	155.3	5.55	25	1.02	6.85	13.4	1.16	8.41434	2012-07-01	2022-01-26	114	2	1	0	3
317	2	61	53	2	2	2	2	1	9.58	6.17	1.75	85	223	3.3	2.08	2.26	13.35	893.6	345	9.51	31	2.12	3.94	16	1.27	9.6845	2012-07-01	2023-06-30	132	1	0	0
318	2	74	33	2	2	2	1	1	8.22	5.87	1.42	65	183	4.3	2.03	2.25	15.41	547.9	436.5	6.02	29	2.44	4.83	19.2	1.22	9.36782	2012-07-01	2023-01-28	126	2	1	0	2
319	2	72	35	2	2	2	1	1	4.07	3.72	0.14	61	143	3.8	2.15	2.29	20.59	720.3	346.2	4.7	33	0.73	6.1	46.6	1.19	7.91359	2012-07-01	2023-05-06	130	2	1	0	3
320	1	49	60	2	2	2	2	1	6.06	4.24	0.85	58	303	4.5	2.07	2.21	27.45	1315.2	517.1	5.62	33	1.28	2.99	27.8	1.24	8.65393	2012-07-01	2023-06-30	132	1	0	0
321	2	49	42	2	1	2	1	1	7.11	4.39	1.57	74	335	3.2	2.13	1.81	17.48	625.7	483.7	6.15	56	0.71	3.67	17.7	1.24	8.1547	2012-07-01	2022-03-30	116	3	0	0
322	1	49	73	2	2	2	1	1	6.52	5.93	0.26	68	237	3.9	1.95	2.09	19.9	1172	546.7	6.53	33	1.3	4.39	42.1	1.26	8.81951	2012-07-01	2023-06-30	132	1	0	0
323	1	55	13	2	2	2	2	1	5.94	3.2	1.9	101	397	4.9	1.76	1.86	23.78	856.1	470.5	16.41	35	0.97	5.13	20.6	1.24	9.44817	2012-07-01	2018-12-03	77	4	0	0
324	1	76	66	2	2	2	2	1	9	8.45	0.46	90	210	4.2	1.53	1.73	28.15	1088.9	647.9	11.86	30	1.51	4.64	31.1	1.22	9.56602	2012-07-01	2020-02-12	91	2	1	1	1	4
325	1	62	64	2	2	2	1	1	3.79	2.63	0.91	83	170	4.6	1.94	2.73	25.05	776.8	461.1	5.48	33.5	0.77	3.47	44.3	1.23	8.12048	2012-07-01	2017-12-31	65	4	0	0
326	2	54	12	2	2	2	2	1	5.62	4.59	0.49	67	118	4	1.96	2.32	28.86	1140.6	364.1	7.44	22	1.85	2.85	11.1	1.19	9.30279	2012-07-01	2019-10-17	87	5	0	0
327	2	65	43	2	2	2	2	1	11.35	6.94	3.48	97	483	4.5	2.06	2.26	11.49	512	358.2	7.08	30	3.13	6.92	17.7	1.25	9.77904	2012-07-01	2021-01-23	102	2	1	1	1	4
328	2	59	42	2	2	2	1	1	5	3.71	0.43	64	219	5.7	1.81	1.69	16.7	643.1	484.6	6.55	46	1.44	4.52	21.7	1.23	8.92484	2012-07-01	2019-10-18	87	4	0	0
329	2	61	95	2	2	2	1	2	6.26	5.32	0.72	56	132	4.9	2.26	2.32	28.7	870	722.5	5.28	37	1.59	5.74	37.7	1.22	8.8084	2012-07-01	2019-11-26	88	2	1	1	1	4
330	1	81	45	2	2	2	2	1	6.31	4.39	0.98	97	220	4.6	2.76	2.94	24.3	1066	478.5	7.92	31	0.84	4.25	26.5	1.21	8.57577	2012-07-01	2020-08-19	97	2	1	0	2
331	2	56	21	2	2	2	2	2	7.5	5.95	0.83	77	374	3.7	1.78	2.2	17.71	645.9	450.5	20.67	19	3.38	4.46	12.2	1.24	10.9273	2012-07-01	2020-09-15	98	2	1	1	1	2
332	2	61	5	2	2	2	2	1	9.21	6.93	0.94	85	342	5.2	2.52	2.6	24.46	580	484.6	14.29	36	0.77	3.76	16.3	1.2	9.07893	2012-07-01	2017-05-10	58	2	1	1	1	1
333	2	60	11	2	1	1	1	1	5.92	4.7	0.57	74	253	4.2	1.5	1.58	40.65	862.1	616	20.9	36	0.87	3.01	29.7	1.22	9.58122	2012-07-01	2016-10-16	51	2	1	1	1	1
334	1	64	47	2	1	2	1	1	4.08	3.3	0.55	67	177	3.86	2.2	3	16.02	812.1	381	5.9	33.5	0.96	4.84	29.6	1.2	8.41487	2012-07-01	2016-12-27	53	4	0	0
335	2	66	10	2	2	2	2	1	9.71	7.15	1.51	75	305	3.4	2.16	2.32	8.66	543	307.7	5.78	32	1.8	5.18	22.4	1.24	9.02293	2012-07-01	2016-12-29	53	2	1	1	1	1
336	2	31	15	2	2	2	1	1	15.24	12.34	1.35	67	102	3.5	1.76	1.9	20.12	873.2	649.9	5.31	33	1.89	5.53	26	1.23	8.9869	2012-07-01	2016-12-30	53	2	1	0	4
337	1	65	49	2	1	2	1	1	6.05	5.62	0.21	47	107	4.6	1.9	2.18	34.7	792	576.7	7.78	26	1.12	3.11	65.3	1.21	8.84562	2012-07-01	2016-05-12	46	2	1	1	1	1
338	1	68	6	2	2	2	2	1	5.73	3.97	1.1	83	216	3.8	2.25	2.39	9.9	387.2	181.4	9.34	33	1.61	5.32	15.4	1.24	9.39128	2012-07-01	2020-08-08	97	2	1	1	1	4
339	1	60	47	2	2	2	1	1	5.78	4.28	0.47	113	203	4.4	2.34	2.34	17.25	454.9	294.1	6.17	40	1.39	3.97	15.4	1.26	8.82974	2012-07-01	2023-06-30	132	1	0	0
340	1	62	74	1	2	2	1	1	4.35	2.74	0.99	100	205	6	1.99	2.01	25.19	1061.8	518.1	4.63	39	0.89	3.68	33.8	1.25	8.09676	2012-07-01	2023-06-30	132	1	0	0
341	2	66	127	1	1	2	1	2	4.83	3.38	0.79	122	60	5.6	2.05	2.21	32.3	999	774.7	5.07	32	0.99	4.66	12	1.22	8.29403	2012-07-01	2021-11-15	112	2	1	0	3
342	2	51	186	1	2	1	1	2	5	3.7	0.8	96	152	5.54	2.55	2.65	44.52	1106.2	574.6	7.09	35	0.75	4.32	16.1	1.18	8.35174	2012-07-01	2023-06-30	132	1	0	0
343	2	36	178	1	2	1	1	2	8.29	6.97	0.55	73	257	6.72	2.48	2.544	23.19	1029	430.3	4.62	36.8	2.06	3.6	33.7	1.26	8.93384	2012-07-01	2023-06-30	132	1	0	0
344	2	47	140	1	2	2	1	1	5.8	4.6	0.5	119	142	6.87	2.37	2.41	23.01	832.3	689.8	4.74	38	0.89	4.22	18.5	1.2	8.12024	2012-07-01	2023-06-30	132	1	0	0
345	2	42	89	1	1	2	1	1	4.89	3.72	0.8	83	154	5.88	2.28	2.34	23.63	1143.6	512.6	7.85	37	1.13	3.78	31.2	1.22	8.86347	2012-07-01	2018-08-05	73	2	1	1	1	2
346	1	62	97	1	2	2	2	1	9.03	6.19	1.66	103	331	5.3	2.25	2.33	21	1039	349.1	4.58	36	1.2	4.11	29.7	1.17	8.38476	2012-07-01	2017-08-21	61	2	1	1	1	2
347	1	28	66	1	1	2	1	1	10.28	8.33	1.01	111	265	5.2	2.58	2.56	21	1168	323.7	5.14	41	1.72	4.5	10.3	1.23	8.86011	2012-07-01	2016-12-30	53	2	1	1	1	1
348	2	52	71	1	2	2	1	1	3.12	2.03	0.53	91	288	4.41	2.53	2.63	18.19	718.9	308.9	6.36	35	1.35	4.89	29	1.24	8.83087	2012-07-01	2016-12-30	53	4	0	0
349	1	56	103	1	2	2	2	1	5.74	4.07	1.05	131	109	4.2	2.5	2.56	26.4	1626	545.4	6.56	37	1.29	3.68	17.7	1.21	8.81637	2012-07-01	2016-01-12	42	2	1	1	1	1
350	1	60	117	1	1	2	1	1	8.1	6.57	0.36	91	238	4.5	2.27	2.39	15.6	742	266.7	5.64	34	1.61	4.76	18	1.23	8.88685	2012-07-01	2016-02-27	43	2	1	1	1	1
351	1	55	69	1	2	2	1	1	11.6	9.5	1.3	88	296	4.9	2.5	2.58	25.2	1180	550.9	9.97	36	1.11	4.79	29.6	1.23	9.08468	2012-07-01	2016-07-13	48	2	1	1	1	2
352	1	76	38	1	1	2	1	1	8.74	5.69	2.12	136	255	4.3	2.24	2.34	29.3	955.8	508.7	6.52	35	1.69	5.32	18.1	1.21	9.08034	2012-07-01	2016-08-31	49	2	1	1	1	4
353	2	38	144	1	2	2	1	1	7.71	7.26	0.29	50	186	5.96	2.05	2.07	15.29	408.1	242.1	14.89	39	0.85	3.94	30.8	1.22	9.21891	2012-07-01	2020-07-15	96	2	1	1	1	2
354	1	71	57	2	2	2	2	1	9.91	6.96	1.33	95	222	4.3	2.26	2.24	17.77	1056.4	380.9	6.49	41	0.95	3.26	24.75	1.18	8.4997	2012-07-01	2022-06-07	119	2	1	1	1	4
355	1	23	94	2	1	2	2	1	7.97	2.44	2.24	113	170	4.5	2.16	2.02	23.65	1310	424.2	4.68	47	2.2	5.78	19.9	1.29	9.01249	2012-07-01	2023-06-30	132	1	0	0
356	1	20	87	2	1	2	1	1	8.76	7.93	0.27	62	107	3.3	1.72	1.9	20.22	959	339.7	5.49	31	2.16	2.78	4.7	1.24	9.15377	2012-07-01	2023-06-30	132	1	0	0
357	1	27	94	2	2	1	1	2	20.01	19.33	0.26	74	101	5.8	1.89	2.01	45.47	1339	633.1	3.05	34	2.78	4.07	12	1.29	8.81833	2012-07-01	2023-06-30	132	1	0	0
358	1	52	74	2	2	1	2	2	4.39	3.68	0.37	67	171	4.75	2.13	2.27	29.8	889.2	497.9	19.64	33	0.67	5.17	27.9	1.22	9.25783	2012-07-01	2019-01-17	78	2	1	1	1	1
359	1	60	92	2	2	2	1	2	11.3	9.6	0.8	80	114	8.3	1.84	2.04	53.69	1792	486.5	6.07	30	1.4	4.8	28.75	1.21	8.82057	2012-07-01	2020-10-05	99	4	0	0
360	2	68	15	2	1	2	1	1	5.16	3.47	0.99	57	107	3.9	1.78	1.82	23.25	774	511.6	7.76	38	0.95	3.88	21.9	1.18	8.67842	2012-07-01	2016-12-31	53	4	0	0
361	1	57	31	2	1	2	2	2	5.37	4.04	0.47	107	89	5.2	2.4	2.24	37.56	1181.9	529	5.49	48	0.81	4.57	47.1	1.23	8.17294	2012-07-01	2021-01-22	102	2	1	0	4
362	1	58	20	2	2	2	2	1	10.48	8.62	0.39	64	283	5.5	2.06	2.86	22.84	888.9	646.4	15.71	33.5	1.54	4.67	26.74	1.25	8.86	2012-07-01	2020-04-23	93	3	0	0
363	1	65	80	1	2	2	2	1	9.88	8.16	1.01	76	222	4.1	1.75	2.55	42.45	876.2	592.1	8.39	33.5	1.38	4.23	27.3	1.24	8.87	2012-07-01	2022-10-24	123	2	1	1	1	4
364	1	62	14	1	1	2	1	1	10.42	9.13	0.27	56	172	4.6	2.2	2.44	80.74	2477.4	846	5.82	28	1.16	3.78	24.2	1.21	8.88	2012-07-01	2019-01-09	78	2	1	0	2
365	1	64	5	1	2	2	2	1	5.71	4.31	0.71	80	189	3.9	1.4	1.7	14.75	1098	677.3	6.23	25	1.7	4.34	24.03	1.23	8.89	2012-07-01	2018-03-07	68	2	1	0	2
366	2	53	64	1	2	2	2	1	8.53	7.59	0.22	65	181	4.5	1.64	1.78	45.87	475.5	537.8	7.01	33	1.23	5.56	28.3	1.23	8.88	2012-07-01	2021-05-05	106	2	1	1	1	4
367	2	61	16	1	2	2	2	2	2.95	1.84	0.72	91	91	4.3	2.01	2.27	24	785.4	410.5	3.47	27	1.92	5	24.76	1.21	8.87	2012-07-01	2022-08-29	121	2	1	1	1	2
368	1	50	29	1	2	2	2	1	5.62	4.85	0.36	65	231	6.7	2.05	2.29	43.3	1117	551	6.36	28	1.85	5.11	28.75	1.22	8.88	2012-07-01	2019-06-24	83	2	1	1	1	4
